# Supplementary material for: Estimates of introgression as a function of pairwise distances
Source: PubMed Central journal article supplement (PMC6480520; doi:10.1186/s12859-019-2747-z), 2019-04-23
Supplement: 12859_2019_2747_MOESM1_ESM.pdf [file 12859_2019_2747_MOESM1_ESM.pdf]

# Estimates of Introgression as a Function of Pairwise Distances

## SUPPLEMENTAL INFORMATION

|                                                                         |           |
|-------------------------------------------------------------------------|-----------|
| <b>S1 On the Accuracy to Measure the Real Fraction of Introgression</b> | <b>2</b>  |
| Distance of ancestral population                                        | 2         |
| Supplementary Table S1.1. Distance to ancestral population.             | 2         |
| Ancestral population sizes                                              | 4         |
| Supplementary Table S1.2. Ancestral population sizes.                   | 4         |
| Time of gene-flow                                                       | 5         |
| Supplementary Table S1.3. Effect of the time of gene-flow.              | 5         |
| Recombination                                                           | 6         |
| Supplementary Table S1.4. Recombination.                                | 6         |
| The effect of low variability                                           | 7         |
| Supplementary Table S1.5. The effect of low variability.                | 7         |
| The effect of window size                                               | 8         |
| Supplementary Table S1.6. The effect of window size.                    | 8         |
| The effect of sample size                                               | 9         |
| Supplementary Table S1.7. The effect of sample size.                    | 9         |
| <b>S2 Detecting Introgression from Whole Genome Data</b>                | <b>9</b>  |
| Fraction of introgression                                               | 10        |
| Supplementary Table S2.1. Fraction of introgression.                    | 10        |
| Distance of ancestral population                                        | 10        |
| Supplementary Table S2.2. Distance of ancestral population.             | 11        |
| <b>S3 PopGenome Usage</b>                                               | <b>11</b> |

# S1 On the Accuracy to Measure the Real Fraction of Introgression

## Distance of ancestral population

Starting with the following topology (((P1, P2), P3), O) we simulate varying depths to common ancestors of P1 & P2, and at the root (P123O), where recombination rate is fixed with  $4Nr = 50$  ( $r=0.01$ ) for each direction of gene flow.

**Supplementary Table S1.1.** Distance to ancestral population.

| Direction of gene-flow | Distance to ancestral population<br>( $t_{12}$ - $t_{123}$ - $t_{1230}$ ) | $D$    | $f_d$  | $d_f$  |   |
|------------------------|---------------------------------------------------------------------------|--------|--------|--------|---|
| P3→P2                  | 0.3-1-3                                                                   | 0.4388 | 0.7662 | 0.7739 | a |
|                        |                                                                           | 0.7060 | 0.2893 | 0.1884 | b |
|                        |                                                                           | 0.5175 | 0.1667 | 0.2210 | c |
| P3→P2                  | 0.5-1-3                                                                   | 0.4916 | 0.7622 | 0.7837 | a |
|                        |                                                                           | 0.4895 | 0.3283 | 0.1278 | b |
|                        |                                                                           | 0.5619 | 0.1676 | 0.2180 | c |
| P3→P2                  | 0.7-1-3                                                                   | 0.5158 | 0.7675 | 0.7698 | a |
|                        |                                                                           | 0.2928 | 0.3667 | 0.0733 | b |
|                        |                                                                           | 0.6544 | 0.1695 | 0.2487 | c |
| P3→P2                  | 1-1-3                                                                     | 0.5846 | 0.7733 | 0.7014 | a |
|                        |                                                                           | 0.1177 | 0.4003 | 0.0380 | b |
|                        |                                                                           | 0.6033 | 0.1667 | 0.3540 | c |
| P3→P2                  | 0.5-2-3                                                                   | 0.3314 | 0.7901 | 0.8064 | a |
|                        |                                                                           | 1.6221 | 0.0814 | 0.0798 | b |
|                        |                                                                           | 0.6026 | 0.2005 | 0.2252 | c |
| P3→P2                  | 0.5-3-3                                                                   | 0.2704 | 0.8048 | 0.8077 | a |
|                        |                                                                           | 1.9736 | 0.0299 | 0.0884 | b |
|                        |                                                                           | 0.6129 | 0.2087 | 0.2255 | c |
| P3→P2                  | 1-2-3                                                                     | 0.3905 | 0.7978 | 0.8115 | a |
|                        |                                                                           | 1.4075 | 0.0928 | 0.0048 | b |
|                        |                                                                           | 0.4839 | 0.1931 | 0.2361 | c |
| P3→P2                  | 1-3-3                                                                     | 0.3267 | 0.8142 | 0.8212 | a |
|                        |                                                                           | 1.7027 | 0.0343 | 0.0269 | b |
|                        |                                                                           | 0.6096 | 0.2039 | 0.2297 | c |

|       |         |        |        |        |   |
|-------|---------|--------|--------|--------|---|
| P3→P2 | 2-2-3   | 0.5858 | 0.8115 | 0.7254 | a |
|       |         | 0.4688 | 0.1920 | 0.1339 | b |
|       |         | 0.4950 | 0.1761 | 0.3274 | c |
|       |         |        |        |        |   |
| P2→P3 | 0.3-1-3 | 0.1593 | 0.4724 | 0.4320 | a |
|       |         | 0.8882 | 1.8376 | 2.2058 | b |
|       |         | 0.7641 | 0.1412 | 0.1072 | c |
| P2→P3 | 0.5-1-3 | 0.3660 | 0.6895 | 0.6465 | a |
|       |         | 0.2165 | 1.0807 | 1.0442 | b |
|       |         | 0.7532 | 0.1314 | 0.1662 | c |
| P2→P3 | 0.7-1-3 | 0.4925 | 0.7283 | 0.7001 | a |
|       |         | 0.1415 | 0.6811 | 0.3466 | b |
|       |         | 0.6317 | 0.1551 | 0.2418 | c |
| P2→P3 | 1-1-3   | 0.5745 | 0.7569 | 0.7040 | a |
|       |         | 0.1211 | 0.4169 | 0.0473 | b |
|       |         | 0.5876 | 0.1742 | 0.3340 | c |
| P2→P3 | 0.5-2-3 | 0.2525 | 0.6755 | 0.6183 | a |
|       |         | 0.3321 | 1.2255 | 1.4610 | b |
|       |         | 0.8886 | 0.1285 | 0.1333 | c |
| P2→P3 | 0.5-3-3 | 0.2361 | 0.6709 | 0.5852 | a |
|       |         | 0.3760 | 1.3214 | 1.6903 | b |
|       |         | 0.9414 | 0.1249 | 0.1160 | c |
| P2→P3 | 1-2-3   | 0.3952 | 0.7778 | 0.7691 | a |
|       |         | 0.6901 | 0.5376 | 0.3026 | b |
|       |         | 0.4839 | 0.1931 | 0.1895 | c |
| P2→P3 | 1-3-3   | 0.3767 | 0.7589 | 0.7226 | a |
|       |         | 0.8946 | 0.6210 | 0.6119 | b |
|       |         | 0.6854 | 0.1570 | 0.1924 | c |
| P2→P3 | 2-2-3   | 0.5628 | 0.8020 | 0.7188 | a |
|       |         | 0.4822 | 0.1948 | 0.1419 | b |
|       |         | 0.5399 | 0.1839 | 0.3309 | c |

For each direction of gene flow and distance to ancestral populations (see above) we calculated for each statistic ( $D$ ,  $f_d$  and  $d_f$ ) <sup>a</sup> the adjusted  $R^2$  'goodness of fit'. <sup>b</sup>  $SSLF$  'sum of squares due to lack of fit' divided by the sample size  $n=100$ . <sup>c</sup>  $SSPE$  'pure sum of squares error'. The time of gene-flow was a constant at  $0.1 \times 4N$ , the scaled recombination rate is  $4Nr=50$  ( $r=0.01$ ), and the calls to  $ms$  are as follows:

$P3 \rightarrow P2$ :  $ms$  32 1 -l 4 8 8 8 8 -ej  $t_{12}$  2 1 -ej  $t_{123}$  3 1 -ej  $t_{1230}$  4 1 -es 0.1 2 **Fraction** -ej 0.1 5 3  
-r 50 5000

*P2*→*P3*: *ms* 32 1 -l 4 8 8 8 8 -ej  $t_{12}$  2 1 -ej  $t_{123}$  3 1 -ej  $t_{1230}$  4 1 -es 0.1 3 **Fraction** -ej 0.1 5 2  
 -r 50 5000

## Ancestral population sizes

We varied ancestral population sizes at the nodes P12 and P123 and simulated the impact on the ( $D$ ,  $f_d$  and  $d_f$ ) statistics (see supplementary table S1.2 below).

Supplementary Table S1.2. Ancestral population sizes.

| Direction of gene-flow | Ancestral population size<br>N12 vs N123 | $D$    | $f_d$  | $d_f$  |   |
|------------------------|------------------------------------------|--------|--------|--------|---|
| P3→P2                  | 2-1                                      | 0.4857 | 0.8177 | 0.8237 | a |
|                        |                                          | 0.9736 | 0.1292 | 0.0036 | b |
|                        |                                          | 0.4743 | 0.1743 | 0.2197 | c |
| P3→P2                  | 10-1                                     | 0.5790 | 0.8000 | 0.7677 | a |
|                        |                                          | 0.6137 | 0.1867 | 0.0649 | b |
|                        |                                          | 0.4147 | 0.1841 | 0.2693 | c |
| P3→P2                  | 10-2                                     | 0.6208 | 0.7957 | 0.7778 | a |
|                        |                                          | 0.4066 | 0.1200 | 0.0147 | b |
|                        |                                          | 0.4288 | 0.2109 | 0.2804 | c |
| P3→P2                  | 1-2                                      | 0.4133 | 0.8275 | 0.8342 | a |
|                        |                                          | 1.1476 | 0.0668 | 0.0304 | b |
|                        |                                          | 0.6070 | 0.1809 | 0.2065 | c |
| P3→P2                  | 1-10                                     | 0.4606 | 0.8031 | 0.8062 | a |
|                        |                                          | 1.0477 | 0.0084 | 0.1009 | b |
|                        |                                          | 0.4794 | 0.2411 | 0.2165 | c |
| P3→P2                  | 2-10                                     | 0.5955 | 0.7950 | 0.8022 | a |
|                        |                                          | 0.5244 | 0.0095 | 0.0474 | b |
|                        |                                          | 0.4276 | 0.2555 | 0.2420 | c |

For different ancestral population sizes (multiples of 1, 2 and  $10 \times 4N$ ) at nodes P12 and P123 we calculated for each statistic ( $D$ ,  $f_d$  and  $d_f$ ) and present <sup>a</sup> the adjusted  $R^2$  ‘goodness of fit’. <sup>b</sup> *SSLF* ‘sum of squares due to lack of fit’ divided by the sample size  $n=100$ . <sup>c</sup> *SSPE* ‘pure sum of squares error’. The time of gene-flow ( $t_{GF}$ ) is  $0.1 \times 4N$ , scaled recombination rate is  $4Nr=50$  ( $r=0.01$ ), and background history is: P12= $1 \times 4N$ , P123= $2 \times 4N$  and P123O= $3 \times 4N$ , and the calls to *ms* are:

P3→P2: ms 32 1 -l 4 8 8 8 8 -ej 1 2 1 -en 1.01 1 N12 -ej 2 3 1 -en 2.01 1 N123 -ej 3 4 1  
-es 0.1 2 Fraction -ej 0.1 5 3 -r 50 5000

## Time of gene-flow

**Supplementary Table S1.3.** Effect of the time of gene-flow.

| Direction of gene-flow | Time of Gene-flow ( $t_{GF}$ ) | $D$    | $f_d$  | $d_f$  |   |
|------------------------|--------------------------------|--------|--------|--------|---|
| P3→P2                  | 0.1                            | 0.3905 | 0.7978 | 0.8115 | a |
|                        |                                | 1.4075 | 0.0928 | 0.0048 | b |
|                        |                                | 0.4839 | 0.1931 | 0.2361 | c |
| P3→P2                  | 0.3                            | 0.3918 | 0.7681 | 0.7870 | a |
|                        |                                | 1.1462 | 0.4039 | 0.0255 | b |
|                        |                                | 0.6805 | 0.1530 | 0.2659 | c |
| P3→P2                  | 0.5                            | 0.3805 | 0.7291 | 0.7525 | a |
|                        |                                | 1.0277 | 0.7815 | 0.0782 | b |
|                        |                                | 0.7240 | 0.1250 | 0.2924 | c |
| P3→P2                  | 0.7                            | 0.4084 | 0.7308 | 0.7620 | a |
|                        |                                | 0.7601 | 1.1447 | 0.1341 | b |
|                        |                                | 0.7850 | 0.0895 | 0.2751 | c |
| P2→P3                  | 0.1                            | 0.3952 | 0.7778 | 0.7691 | a |
|                        |                                | 0.6901 | 0.5376 | 0.3026 | b |
|                        |                                | 0.4839 | 0.1931 | 0.1895 | c |
| P2→P3                  | 0.3                            | 0.3702 | 0.6938 | 0.7003 | a |
|                        |                                | 0.4257 | 1.2463 | 0.5155 | b |
|                        |                                | 0.8134 | 0.1078 | 0.2379 | c |
| P2→P3                  | 0.5                            | 0.3069 | 0.5779 | 0.5936 | a |
|                        |                                | 0.2800 | 2.0306 | 0.9803 | b |
|                        |                                | 0.9632 | 0.0690 | 0.2356 | c |
| P2→P3                  | 0.7                            | 0.1639 | 0.4283 | 0.4617 | a |
|                        |                                | 0.4376 | 2.7323 | 1.7089 | b |
|                        |                                | 1.3510 | 0.0432 | 0.1957 | c |

For each direction of introgression we varied the time of gene-flow (0.1, 0.3, 0.5, 0.7 × 4N) and calculated for each statistic ( $D$ ,  $f_d$  and  $d_f$ ) <sup>a</sup> the adjusted  $R^2$  'goodness of fit'. <sup>b</sup> SSLF 'sum of squares due to lack of fit' divided by the sample size n=100. <sup>c</sup> SSPE 'pure sum of

squares error'. Scaled recombination rate is  $4Nr=50$  ( $r=0.01$ ). The background history is:  $P_{12}=1 \times 4N$ ,  $P_{123}=2 \times 4N$  and  $P_{1230}=3 \times 4N$  generations ago. The calls to *ms* are:  
 $P_3 \rightarrow P_2$ : *ms* 32 1 -l 4 8 8 8 8 -ej 1 2 1 -ej 2 3 1 -ej 3 4 1 -es  $t_{GF}$  2 **Fraction** -ej  $t_{GF}$  5 3 -r 50  
5000

## Recombination

To test the impact of recombination on these statistics we varied the recombination rates from ( $r = 0 - .08$ ). With increasing recombination rates the accuracy to measure the real fraction of introgression increases for  $f_d$  and  $d_f$  while the Patterson's  $D$  is rarely affected by varying this parameter.

Supplementary Table S1.4. Recombination.

| Direction of gene-flow | Recombination rate $r$ | $D$    | $f_d$  | $d_f$  |   |
|------------------------|------------------------|--------|--------|--------|---|
| P3→P2                  | 0/5000                 | 0.3307 | 0.6335 | 0.6062 | a |
|                        |                        | 0.7697 | 0.1066 | 0.0139 | b |
|                        |                        | 1.4885 | 0.4485 | 0.6535 | c |
| P3→P2                  | 50/5000                | 0.3905 | 0.7978 | 0.8115 | a |
|                        |                        | 1.4075 | 0.0928 | 0.0048 | b |
|                        |                        | 0.4839 | 0.1931 | 0.2361 | c |
| P3→P2                  | 100/5000               | 0.4072 | 0.8676 | 0.8758 | a |
|                        |                        | 1.4905 | 0.1114 | 0.0080 | b |
|                        |                        | 0.3725 | 0.1155 | 0.1467 | c |
| P3→P2                  | 200/5000               | 0.4046 | 0.8986 | 0.9020 | a |
|                        |                        | 1.5117 | 0.1163 | 0.0121 | b |
|                        |                        | 0.3639 | 0.0864 | 0.1096 | c |
| P3→P2                  | 300/5000               | 0.4069 | 0.9249 | 0.9257 | a |
|                        |                        | 1.5641 | 0.1209 | 0.0150 | b |
|                        |                        | 0.3191 | 0.0625 | 0.0820 | c |
| P3→P2                  | 400/5000               | 0.4041 | 0.9383 | 0.9360 | a |
|                        |                        | 1.5778 | 0.1223 | 0.0169 | b |
|                        |                        | 0.3186 | 0.0510 | 0.0691 | c |

For recombination rates varying from (0 to .08) we calculated for each statistic ( $D$ ,  $f_d$  and  $d_f$ ) <sup>a</sup> the adjusted  $R^2$  'goodness of fit'. <sup>b</sup> *SSLF* 'sum of squares due to lack of fit' divided by the sample size  $n=100$ . <sup>c</sup> *SSPE* 'pure sum of squares error'. The time of gene-flow ( $t_{GF}$ )

was a constant at  $0.1 \times 4N$ , background history is  $P_{12}=1 \times 4N$ ,  $P_{123}=2 \times 4N$  and  $P_{1234}=3 \times 4N$ , and the calls to *ms* are as follows:

*P3→P2: ms 32 1 -l 4 8 8 8 8 -ej 1 2 1 -ej 2 3 1 -ej 3 4 1 -es 0.1 2 Fraction -ej 0.1 5 3 -r r × 5000 5000*

## The effect of low variability

We varied the nucleotide diversity  $\theta$  to test the effect of low variability on the statistics  $D$ ,  $f_d$  and  $d_f$ .

**Supplementary Table S1.5.** The effect of low variability.

| Direction of gene-flow | Variability theta ( $\theta$ ) | $D$    | $f_d$  | $d_f$  |   |
|------------------------|--------------------------------|--------|--------|--------|---|
| P3→P2                  | 3                              | 0.3960 | 0.8153 | 0.8197 | a |
|                        |                                | 1.3084 | 0.1108 | 0.0130 | b |
|                        |                                | 0.5743 | 0.1772 | 0.2252 | c |
| P3→P2                  | 5                              | 0.4015 | 0.8083 | 0.8205 | a |
|                        |                                | 1.3239 | 0.1218 | 0.0192 | b |
|                        |                                | 0.5362 | 0.1832 | 0.2206 | c |
| P3→P2                  | 25                             | 0.4035 | 0.7991 | 0.8102 | a |
|                        |                                | 1.2020 | 0.1310 | 0.0229 | b |
|                        |                                | 0.6193 | 0.1923 | 0.2379 | c |
| P3→P2                  | 50                             | 0.4092 | 0.8068 | 0.8217 | a |
|                        |                                | 1.3574 | 0.1009 | 0.0064 | b |
|                        |                                | 0.4953 | 0.1866 | 0.2277 | c |

For unidirectional gene-flow  $P_3 \rightarrow P_2$  for 5kb sequences, we varied  $\theta$  from 3 - 50 and calculated for each statistic ( $D$ ,  $f_d$  and  $d_f$ ) and present <sup>a</sup> the adjusted  $R^2$  'goodness of fit'. <sup>b</sup> *SSLF* 'sum of squares due to lack of fit' divided by the sample size  $n=100$ . <sup>c</sup> *SSPE* 'pure sum of squares error'. The time of gene-flow ( $t_{GF}$ ) was a constant at  $0.1 \times 4N$ , the scaled recombination rate is  $4Nr=50$  ( $r=0.01$ ) and background history is  $P_{12}=1 \times 4N$ ,  $P_{123}=2 \times 4N$  and  $P_{1234}=3 \times 4N$ . The calls to *ms* are:

*P3→P2: ms 32 1 -l 4 8 8 8 8 -ej 1 2 1 -ej 2 3 1 -ej 3 4 1 -es 0.1 2 Fraction -ej 0.1 5 3 -r 50 5000 -t theta*

## The effect of window size

We varied the size of the window (kb) to test this effect on the statistics  $D$ ,  $f_d$  and  $d_f$ .

**Supplementary Table S1.6.** The effect of window size.

| Direction of gene-flow | Window size (kb) | $D$  | $f_d$ | $d_f$ |   |
|------------------------|------------------|------|-------|-------|---|
| P3→P2                  | 0.5              | 0.16 | 0.63  | 0.63  | a |
|                        |                  | 1.24 | 0.12  | 0.01  | b |
|                        |                  | 2.20 | 0.44  | 0.63  | c |
| P3→P2                  | 1                | 0.22 | 0.68  | 0.70  | a |
|                        |                  | 1.31 | 0.10  | 0.01  | b |
|                        |                  | 1.75 | 0.36  | 0.45  | c |
| P3→P2                  | 5                | 0.39 | 0.80  | 0.81  | a |
|                        |                  | 1.40 | 0.09  | 0     | b |
|                        |                  | 0.48 | 0.19  | 0.24  | c |
| P3→P2                  | 10               | 0.46 | 0.87  | 0.88  | a |
|                        |                  | 1.45 | 0.11  | 0.01  | b |
|                        |                  | 0.25 | 0.12  | 0.14  | c |
| P3→P2                  | 50               | 0.50 | 0.95  | 0.95  | a |
|                        |                  | 1.62 | 0.12  | 0.01  | b |
|                        |                  | 0.06 | 0.04  | 0.05  | c |

For unidirectional gene-flow P3→P2, we varied the window size and calculated for each statistic ( $D$ ,  $f_d$  and  $d_f$ ) and present <sup>a</sup> the adjusted  $R^2$  'goodness of fit'. <sup>b</sup>  $SSLF$  'sum of squares due to lack of fit' divided by the sample size  $n=100$ . <sup>c</sup>  $SSPE$  'pure sum of squares error'. The time of gene-flow ( $t_{GF}$ ) was at  $0.1 \times 4N$ , the scaled recombination rate is  $r=0.01$  and background history is  $P12=1 \times 4N$ ,  $P123=2 \times 4N$  and  $P123O=3 \times 4N$ . The calls to  $ms$  are: ***P3→P2: ms 32 1 -l 4 8 8 8 8 -ej 1 2 1 -ej 2 3 1 -ej 3 4 1 -es 0.1 2 Fraction -ej 0.1 5 3 -r kb×10 kb×1000***

## The effect of sample size

We varied the sample size ( $s$ ) to test this effect on the statistics  $D$ ,  $f_d$  and  $d_f$ .

**Supplementary Table S1.7.** The effect of sample size.

| Direction of gene-flow | Sample size $s$ | $D$ | $f_d$ | $d_f$ |
|------------------------|-----------------|-----|-------|-------|
|------------------------|-----------------|-----|-------|-------|



|       |     |        |        |        |   |
|-------|-----|--------|--------|--------|---|
| P3→P2 | 8   | 0.3905 | 0.7978 | 0.8115 | a |
|       |     | 1.4075 | 0.0928 | 0.0048 | b |
|       |     | 0.4839 | 0.1931 | 0.2361 | c |
| P3→P2 | 20  | 0.3794 | 0.8119 | 0.8227 | a |
|       |     | 1.4429 | 0.0695 | 0.0112 | b |
|       |     | 0.4880 | 0.1911 | 0.2142 | c |
| P3→P2 | 50  | 0.3831 | 0.8076 | 0.8238 | a |
|       |     | 1.4469 | 0.053  | 0.0102 | b |
|       |     | 0.4996 | 0.1969 | 0.2115 | c |
| P3→P2 | 100 | 0.3803 | 0.8362 | 0.8472 | a |
|       |     | 1.4267 | 0.0561 | 0.0116 | b |
|       |     | 0.4931 | 0.1673 | 0.1840 | c |

For unidirectional gene-flow P3→P2, we varied the sample size and calculated for each statistic ( $D$ ,  $f_d$  and  $d_i$ ) and present <sup>a</sup> the adjusted  $R^2$  'goodness of fit'. <sup>b</sup> SSLF 'sum of squares due to lack of fit' divided by the sample size  $n=100$ . <sup>c</sup> SSPE 'pure sum of squares error'. The time of gene-flow ( $t_{GF}$ ) was a constant at  $0.1 \times 4N$ , the scaled recombination rate is  $4Nr=50$  ( $r=0.01$ ) and background history is  $P12=1 \times 4N$ ,  $P123=2 \times 4N$  and  $P123O=3 \times 4N$ .

The calls to *ms* are:

```
P3→P2: ms 4xs 1 -l 4 s s s s -ej 1 2 1 -ej 2 3 1 -ej 3 4 1 -es 0.1 2 Fraction -ej 0.1 5 3 -r
50 5000
```

## S2 Detecting Introgression from Whole Genome Data

To test the performance of the various statistics ( $D$ ,  $f_d$ ,  $RNDmin$ ,  $d_i$ ) to distinguish neutral models from models with varying levels of introgression or varying distances to ancestral populations, we performed two simulations on 1kb windows. For each statistic of interest we present the area under the curve (AUC) values. All simulations start with 10,000 loci under the neutral scenario ( $f=0$ ) and 1,000 loci with subject to introgression. The Recombination rate is fixed at  $r=0.01$ .

### Fraction of introgression

To test the impact of varying the fraction of introgression we simulated the fraction of introgression for the 'alternative model' from  $f=0.1$  to  $f=1$  and compared this to the neutral scenario where the fraction of introgression is zero ( $f=0$ ). See below (supplementary Table S2.1).

Supplementary Table S2.1. Fraction of introgression.

| Direction of gene-flow | Fraction of introgression $f$ | $D$    | $f_d$  | $RNDmin$ | $d_f$  |
|------------------------|-------------------------------|--------|--------|----------|--------|
| P3→P2                  | 0.1                           | 0.6252 | 0.7128 | 0.5579   | 0.7065 |
| P3→P2                  | 0.2                           | 0.6846 | 0.8426 | 0.6043   | 0.8330 |
| P3→P2                  | 0.3                           | 0.7163 | 0.9221 | 0.6479   | 0.9139 |
| P3→P2                  | 0.4                           | 0.7293 | 0.9541 | 0.7196   | 0.9478 |
| P3→P2                  | 0.5                           | 0.7380 | 0.9810 | 0.7588   | 0.9753 |
| P3→P2                  | 0.6                           | 0.7466 | 0.9922 | 0.8246   | 0.9890 |
| P3→P2                  | 0.7                           | 0.7585 | 0.9979 | 0.8510   | 0.9961 |
| P3→P2                  | 0.8                           | 0.7607 | 0.9988 | 0.9216   | 0.9980 |
| P3→P2                  | 0.9                           | 0.7748 | 1      | 0.9659   | 0.9996 |
| P3→P2                  | 1                             | 0.7871 | 1      | 1        | 0.9998 |

The effect of varying fractions of introgression on the model utility in the ROC analysis as indicated for values of AUC. The background history (coalescent times) is:  $P12=1 \times 4N$ ,  $P123=2 \times 4N$  and  $P123O=3 \times 4N$  generations ago. The time of gene-flow ( $t_{GF}$ ) was set to  $0.1 \times 4N$  generations ago and the recombination rate is  $r=0.01$ . The calls to *ms* are:

*Neutral model: ms 32 1 -l 4 8 8 8 8 -ej 1 2 1 -ej 2 3 1 -ej 3 4 1 -r 10 1000*

*Alternative model: P3→P2: ms 32 1 -l 4 8 8 8 8 -ej 1 2 1 -ej 2 3 1 -ej 3 4 1 -es 0.1 2 (1-f) -ej 0.1 5 3 -r 10 1000*

## Distance of ancestral population

Finally, by varying the distance to ancestral populations we tested the impact of a low amount of introgression on the various statistics.

Supplementary Table S2.2. Distance of ancestral population.

| Direction of gene-flow | Distance to ancestral population ( $t_{12}-t_{123}-t_{123O}$ ) | $D$    | $f_d$  | $RNDmin$ | $d_f$  |
|------------------------|----------------------------------------------------------------|--------|--------|----------|--------|
| P3→P2                  | 0.3-1-3                                                        | 0.6366 | 0.6860 | 0.5308   | 0.6782 |
| P3→P2                  | 1-1-3                                                          | 0.5884 | 0.6077 | 0.5107   | 0.5969 |
| P3→P2                  | 0.5-2-3                                                        | 0.6314 | 0.7292 | 0.5489   | 0.7272 |
| P3→P2                  | 0.5-3-3                                                        | 0.6454 | 0.7493 | 0.5498   | 0.7488 |
| P3→P2                  | 1-2-3                                                          | 0.6252 | 0.7128 | 0.5482   | 0.7065 |

|       |         |        |        |        |        |
|-------|---------|--------|--------|--------|--------|
| P3→P2 | 1-3-3   | 0.6465 | 0.7604 | 0.5690 | 0.7575 |
| P3→P2 | 2-2-3   | 0.6016 | 0.6406 | 0.5312 | 0.6220 |
| P3→P2 | 1.5-2-3 | 0.6065 | 0.6680 | 0.5526 | 0.6573 |

10,000 loci under the neutral scenario ( $f=0$ ). Fraction of introgression for the 'alternative model' simulations is  $f=0.1$  (1,000 loci). Recombination rate is  $r=0.01$ . Time of gene-flow ( $t_{GF}$ ) is  $0.1 \times 4N$  generations ago. The calls to *ms* are:

*Neutral model:*

```
ms 32 1 -l 4 8 8 8 8 -ej t12 2 1 -ej t123 3 1 -ej t1234 4 1 -r 10 1000
```

*Alternative model:*

```
P3→P2: ms 32 1 -l 4 8 8 8 8 -ej t12 2 1 -ej t123 3 1 -ej t1234 4 1 -es 0.1 2 0.9 -ej 0.1 5 3 -r 10 1000
```

## S3 PopGenome Usage

**# Install and load supporting packages from CRAN/GitHub within R**

```
install.packages("dplyr")
```

```
install.packages("devtools")
```

```
library(dplyr)
```

```
library(devtools)
```

```
#Install PopGenome
```

```
#install.packages("PopGenome")
```

**# Install the PopGenome package from github**

```
install_github("pievos101/PopGenome")
```

**# Load the PopGenome package**

```
library(PopGenome)
```

```
###
```

*Read the data (Fontaine, M. C., Pease, J. B., Steele, A., Waterhouse, R. M., Neafsey, D. E., Sharakhov, I. V., et al. (2015). Mosquito genomics.*

*Extensive introgression in a malaria vector species complex revealed by phylogenomics. Science, 347(6217), 1258524–1258524.*

<http://doi.org/10.1126/science.1258524>)

###

```
genome =  
readVCF("AGC_refHC_bialSNP_AC2_2DPGQ.3L_V2.CHRcode2.DRYAD.vcf.gz",  
10000,"4",1,45000000, include.unknown=TRUE)
```

**# Define the populations**

```
Aquad = c("SRS408143", "SRS408145", "SRS408151", "SRS408155",  
"SRS408966", "SRS408969", "SRS408972", "SRS408973", "SRS408983",  
"SRS420578")
```

```
Amela = c("SRS408142", "SRS408185", "SRS408994")
```

```
Ameru = c("SRS408186", "SRS408187", "SRS408967", "SRS408974",  
"SRS408992", "SRS410266", "SRS410284", "SRS410286", "SRS410290",  
"SRS420577")
```

**# Define the outgroup**

```
Chris = c("CHRISTYI")
```

**# Set the populations**

```
genome = set.populations(genome, list(Aquad,Amela,Ameru),diploid=TRUE)
```

**# Set the outgroup**

```
genome = set.outgroup(genome, Chris, diploid=TRUE)
```

**# Perform the weighted jackknife for the inverted region**

```
inversionStart=1.45e07
```

```
inversionEnd=3.575e07
```

**# Split the data into 50kb windows within the inversion**

```

slide =
sliding.window.transform(genome,jump=50000,width=50000,start.pos=inversio
nStart, end.pos=inversionEnd, type=2)

# Perform the introgression statistics
slide = introgression.stats(slide, l.smooth=TRUE)

# weighted jackknife
slide = weighted.jackknife(slide, per.region=FALSE)

# show results
slide@D.z
slide@D.pval
slide@df.z
slide@df.pval

# standard error
slide@df.SE
slide@D.SE

# Test for df outlier within the the inversion

# Calculate Z-values
meandf = mean(slide@df, na.rm=TRUE)
Z = (as.vector(slide@df)-meandf)/as.vector(slide@df.SE)

# Calculate P-values
P = 2*(pnorm(-abs(Z)))

# BH correct the P-values
adjP = p.adjust(1-P, "BH")

# get significant loci

```

```

out.ids = which((1-adjP)<0.05)
out.ids2 = which((1-adjP)<0.01)

# Get the genomic positions
genome.pos = sapply(slide@region.names,function(x){
  split = strsplit(x," ")[[1]][c(1,3)]
  val = mean(as.numeric(split))
  return(val)
})

#save inversion results
outINV = out.ids
outINV2 = out.ids2
slideINV = slide
genome.pos.INV = genome.pos
outINV_names = slide@region.names[out.ids]
outINV2_names = slide@region.names[out.ids2]
Z_INV = Z

# Test for df outliers from the beginning of the chromosome 3L to the
start of the inversion

# First, split the data into 50kb windows outside the inversion
slide =
sliding.window.transform(genome,jump=50000,width=50000,start.pos=1,
end.pos=inversionStart, type=2)

# Perform the introgression statistics
slide = introgression.stats(slide, l.smooth=TRUE)

# weighted jackknife
slide = weighted.jackknife(slide, per.region=FALSE)

```

```

# Calculate Z-values (Ho == 0)
Z = (as.vector(slide@df)-0)/as.vector(slide@df.SE)

# Calculate P-values
P = 2*(pnorm(-abs(Z)))

# BH correct the P-values
adjP = p.adjust(1-P, "BH")

# get significant loci
out.ids = which((1-adjP)<0.05)
out.ids2 = which((1-adjP)<0.01)

slide@region.names[out.ids]

# get genomic positions
genome.pos = sapply(slide@region.names,function(x){
  split = strsplit(x," ")[[1]][c(1,3)]
  val = mean(as.numeric(split))
  return(val)
})

# save the results
outLeft = out.ids
outLeft2 = out.ids2
slideOUTleft = slide
genome.pos.Left = genome.pos
outLeft_names = slide@region.names[out.ids]
outLeft2_names = slide@region.names[out.ids2]
Z_Left = Z

```

```

# Test for df outlier outside the the inversion to the end of chromosome
3L

# First, split the data into 50kb windows outside the inversion
slide =
sliding.window.transform(genome,jump=50000,width=50000,start.pos=inversio
nEnd, end.pos=45000000, type=2)

# Perform the introgression statistics
slide = introgression.stats(slide, l.smooth=TRUE)

# weighted jackknife
slide = weighted.jackknife(slide, per.region=FALSE)

# Calculate Z-values
Z = (as.vector(slide@df)-0)/as.vector(slide@df.SE)

# Calculate P-values
P = 2*(pnorm(-abs(Z)))

# BH correct the P-values
adjP = p.adjust(1-P, "BH")

# get significant loci
out.ids = which((1-adjP)<0.05)
out.ids2 = which((1-adjP)<0.01)

slide@region.names[out.ids]

# get genomic positions
genome.pos = sapply(slide@region.names,function(x){
  split = strsplit(x," ")[[1]][c(1,3)]
  val = mean(as.numeric(split))

```



```

    return(val)
})
#save the results
outRight = out.ids
outRight2 = out.ids2
slideOUTright = slide
genome.pos.Right = genome.pos
outRight_names = slide@region.names[out.ids]
outRight2_names = slide@region.names[out.ids2]
Z_Right = Z

# concatenate results
genome.posCHR3L <- c(genome.pos.Left,genome.pos.INV,genome.pos.Right)
df_CHR3L          <- c(slideOUTleft@df,slideINV@df,slideOUTright@df)

# plot the overall d-fraction
plot(genome.posCHR3L,as.numeric(df_CHR3L),type="l",
ylim=c(-1,1),xlab=c("genome position"),ylab=c("d
fraction"),col="blue",lwd=2)
title(c("Introgression along chromosome 3La"))
abline(v=inversionStart, lty=2)
abline(v=inversionEnd, lty=2)
abline(h=0, lty=2)

#plot the outliers as red points
points(genome.pos.Left[outLeft],as.numeric(slideOUTleft@df[outLeft]),col=
"ORANGE",pch=".",cex=9.0)
points(genome.pos.INV[outINV],as.numeric(slideINV@df[outINV]),col="ORANGE
",pch=".",cex=9.0)
points(genome.pos.Right[outRight],as.numeric(slideOUTright@df[outRight]),
col="ORANGE",pch=".",cex=9.0)

```

```
points(genome.pos.Left[outLeft2],as.numeric(slideOUTleft@df[outLeft2]),col="RED",pch=".",cex=9.0)
points(genome.pos.INV[outINV2],as.numeric(slideINV@df[outINV2]),col="RED",pch=".",cex=9.0)
points(genome.pos.Right[outRight2],as.numeric(slideOUTright@df[outRight2]),col="RED",pch=".",cex=9.0)
```
